# Supplementary material for: Intersectional Effects of Crystal Features on the Actuation Performance of Dynamic Molecular Crystals
Source: PubMed Central journal article supplement (PMC10251518; doi:10.1021/jacs.3c02184), 2023-05-26
Supplement: ja3c02184_si_001.pdf [file ja3c02184_si_001.pdf]

# Supporting Information

## **Intersectional Effects of Crystal Features on the Actuation Performance of Dynamic Molecular Crystals**

Jad Mahmoud Halabi,<sup>1</sup> Marieh B. Al-Handawi,<sup>1</sup> Rodrigo Ceballos,<sup>2</sup> Panče Naumov<sup>1,3,4,5\*</sup>

<sup>1</sup>*Smart Materials Lab, New York University Abu Dhabi, PO Box 129188, Abu Dhabi, UAE*

<sup>2</sup>*Paige.ai, New York City, NY 10036, USA*

<sup>3</sup>*Center for Smart Engineering Materials, New York University Abu Dhabi, PO Box 129188, Abu Dhabi, UAE*

<sup>4</sup>*Research Center for Environment and Materials, Macedonian Academy of Sciences and Arts, Bul. Krste Misirkov 2, MK–1000 Skopje, Macedonia*

<sup>5</sup>*Molecular Design Institute, Department of Chemistry, New York University, 100 Washington Square East, New York, NY 10003, USA*

This PDF Includes:

- I. Experimental Methods
- II. Tables S1 to S7
- III Figure S1

## I. SUPPORTING EXPERIMENTAL METHODS

**Data collection:** The data utilized in this study have been primarily sourced from published literature between 2006 and 2020 with 68 unique studies, encompassing a range of actuation performance metrics and various crystal features for molecular crystals. In instances where values on the actuation performance were not explicitly stated in the literature, we employed editing software to extract information such as the dimensions of crystals or response and recovery times of the actuation, enabling us to calculate the additional properties and better populate the dataset. In instances where physical, chemical, or mechanical properties were not explicitly specified in the same literature, we resorted to publicly available datasets or alternative literature that report on the same molecule or single crystal. X-ray diffraction information was obtained from the Cambridge Structural Database (CSD) on the same single crystal systems. Where available, we used the crystallography information from the same study that reports on actuation performance. Given that actuation performance studies on molecular single crystals do not always conduct X-ray different analyses, we used the most recently published data that more closely matches the experimental conditions followed during actuation.

We have made every effort to ensure the accuracy of the data collected and the integrity of our analysis. However, it is important to note that we did not conduct any additional experimentation or validation beyond the information provided in the literature. We rely on the accuracy of the original published data, and as such, cannot be held responsible for any discrepancies or inaccuracies that may arise from the source material. By using the data and findings presented in this paper, the reader acknowledges and agrees that the authors are not liable for any errors, discrepancies, or inaccuracies in the original published data. In case any such discrepancies arise or in case the reader has any questions or concerns, please reach out directly to the corresponding author.

We recognize the value of continuous improvement and expansion of the dataset used in this study. As such, we invite and encourage collaboration within the research community to build upon the current data set with new examples of tested and characterized molecular crystals. By populating areas where data may be sparse, refining existing data points through re-experimentation, and incorporating new information, we can collectively enhance the learning capabilities and predictive accuracy of the machine learning model employed in this work.

**Dynamic molecular crystals sample:** The molecular crystals included in the dataset encompass a wide range of photoresponsive and thermoresponsive single crystals. While we recognize there are other examples of dynamic molecular crystals such as mechanoresponsive, electroresponsive, and humidity-responsive crystals, these types of crystals are not as widely and extensively reported on and thereby are excluded from our dataset. Additionally, we recognize the variety of underlying chemical transformations and molecule types within photoresponsive (ex: t-type and p-type photochromic molecules) and thermoresponsive crystals. These differences are accounted for through different crystal features such as chemical families, reaction groups, and classification of single crystals by whether they undergo phase transition transformations, martensitic phase transition transformations, or not. Similarly, and due to few examples reported in the literature, crystals that undergo bending, contraction/expansion, and jumping represent the majority of the samples captured in the data. While the dataset does include crystals that undergo twisting, due to the small sample size, we excluded this type of deformation from the analysis.

Note: A molecular crystal actuation event defined in this work represents the introduction of a single stimulus at a time and a full actuation cycle starts with the introduction of a stimulus and ends after the crystal has gone back to its original condition or has reached steady state after which no motion can be recorded without the introduction of an additional stimulus.

**Ashby Plots:** The Ashby plots in this work were constructed using python and the dataset was collected through a wide literature review on microactuators and a range of soft to hard actuators reported on in recent studies. Additional examples of commercially available actuators were extracted from the ANSYS Granta Materials database.

**Statistical Analysis and Machine Learning code:** The code python files have been uploaded to a public github repository and can be accessed through this link:  
<https://github.com/jmah13/Dynamic-Molecular-Crystals>.

## II. SUPPORTING TABLES

**Supporting Table S1 | Definition of performance indices.** A list of the performance indices relevant to actuator design along with the respective equations, and definitions

| Performance Indices  | Symbol / Unit                                | Equations                                                                                                             | Definitions & Remarks                                                                                                                                                                                                                                                                                                                                                                                                                               |
|----------------------|----------------------------------------------|-----------------------------------------------------------------------------------------------------------------------|-----------------------------------------------------------------------------------------------------------------------------------------------------------------------------------------------------------------------------------------------------------------------------------------------------------------------------------------------------------------------------------------------------------------------------------------------------|
| Free stroke          | $\Delta L$ or $\delta_{\max}$<br>/ m         | Measured                                                                                                              | The maximum stroke or displacement the crystal can achieve under no external load.<br>When not reported, this property was determined from scaled images and videos. For bending crystals, it was determined as the maximum tip displacement                                                                                                                                                                                                        |
| Deformation capacity | $\delta_{\text{capacity}}$<br>/ unitless     | $\delta_{\text{capacity}} = \frac{\delta_{\max}}{L_{\text{active}}}$                                                  | The ratio of the free stroke over the length along the active axis of actuation. In case of axial expansion or contraction deformation capacity is equivalent to deformation strain                                                                                                                                                                                                                                                                 |
| Response time        | $t_{\text{response}}$<br>/ s                 | Measured                                                                                                              | The time the crystal takes to reach maximum stroke. For photoresponsive crystals it is recorded starting when irradiation hits the crystal. For thermoresponsive crystals, it is recorded starting when the administered temperature reaches the activation temperature.<br>Note that the rate of heating is likely to affect the response time but it is not accounted for here for the lack of necessary information about the experimental setup |
| Recovery time        | $t_{\text{recovery}}$<br>/ s                 | Measured                                                                                                              | The time the crystal takes to return to its original form and position if the actuation is fully reversible                                                                                                                                                                                                                                                                                                                                         |
| Velocity             | $v$<br>/ m s <sup>-1</sup>                   | $v = \frac{\delta_{\max}}{t_{\text{response}}}$                                                                       | The calculated maximum velocity of the unrestrained actuator                                                                                                                                                                                                                                                                                                                                                                                        |
| Force output         | $F$<br>/ N                                   | Measured or calculated for object-lifting experiments as:<br>$F = m \cdot g$<br>$m$ : mass of object<br>$g$ : gravity | The force generated by the crystals is typically measured using micro-sensors, micro-fabricated devices, pushing/lifting objects of measured weight. This property does not always represent the maximum force and is often less than the blocking force                                                                                                                                                                                            |
| Force density        | $F_{\text{density}}$<br>/ N m <sup>-3</sup>  | $F_{\text{density}} = \frac{F}{V}$<br>$V$ : total volume                                                              | The force output per unit volume calculated from the dimensions of the crystals                                                                                                                                                                                                                                                                                                                                                                     |
| Work output          | $W$<br>/ J                                   | $W = F \cdot \delta$                                                                                                  | Calculated from the force output and the displacement under loading.<br>Note that when the force output is the blocking force, the work output cannot be determined since there is no displacement and the quantity is effectively null                                                                                                                                                                                                             |
| Work capacity        | $W_{\text{capacity}}$<br>/ J m <sup>-3</sup> | $W_{\text{capacity}} = \frac{W}{V}$                                                                                   | The volumetric work density where the volume is calculated from the dimensions of the crystals                                                                                                                                                                                                                                                                                                                                                      |
| Power output         | $P$<br>/ kW                                  | $P = \frac{W}{t}$                                                                                                     | The work output per second calculated using the time needed to displace a load by $\delta$                                                                                                                                                                                                                                                                                                                                                          |

|                      |                                              |                                                                                                                                                                                                                                                                                                                                                                                                                                                                                                                                                                                                                                                                                                                                   |                                                                                                                                                                                                                                                                                                                                |
|----------------------|----------------------------------------------|-----------------------------------------------------------------------------------------------------------------------------------------------------------------------------------------------------------------------------------------------------------------------------------------------------------------------------------------------------------------------------------------------------------------------------------------------------------------------------------------------------------------------------------------------------------------------------------------------------------------------------------------------------------------------------------------------------------------------------------|--------------------------------------------------------------------------------------------------------------------------------------------------------------------------------------------------------------------------------------------------------------------------------------------------------------------------------|
| <b>Power density</b> | $P_{\text{density}}$<br>/ kW m <sup>-3</sup> | $P_{\text{density}} = \frac{P}{V}$                                                                                                                                                                                                                                                                                                                                                                                                                                                                                                                                                                                                                                                                                                | <i>The volumetric power density where the volume is calculated from the dimensions of the crystals</i>                                                                                                                                                                                                                         |
| <b>Efficiency</b>    | $\eta$<br>/ unitless                         | <p data-bbox="552 315 842 344"><u>Photoactuation efficiency</u></p> $\eta_{\text{photo}} = \frac{P}{P_{\text{irrad}} \cdot S_{\text{irrad}}}$ <p data-bbox="539 412 847 472"><math>P_{\text{irrad}}</math>: irradiation power per unit area (kW m<sup>-2</sup>)</p> <p data-bbox="539 479 847 539"><math>S_{\text{irrad}}</math>: irradiated surface area (m<sup>2</sup>)</p> <p data-bbox="539 591 847 620"><u>Thermoactuation efficiency</u></p> $\eta_{\text{thermo}} = \frac{W}{mc_p \Delta T}$ <p data-bbox="539 687 746 716"><math>m</math>: mass of sample</p> <p data-bbox="539 723 818 752"><math>c_p</math>: specific heat capacity</p> <p data-bbox="539 759 839 788"><math>\Delta T</math>: change in temperature</p> | <p data-bbox="860 501 1350 553"><i>The ratio of the output mechanical power over the thermal or irradiation power.</i></p> <p data-bbox="860 560 1382 636"><i>Note that because the specific heat capacity was often not reported for these crystals, the efficiency of many thermoresponsive crystals is not reported</i></p> |

**Supporting Table S2 | Actuation performance data.** A list of all reported static and dynamic performance indices of molecular crystals' actuation behavior. The spread of data and sample size for each index are reported

|                            | <b>Performance Indices</b>         | <b>Count</b> | <b>Mean</b>           | <b>Std</b>            | <b>Min</b>             | <b>25%</b>             | <b>50%</b>             | <b>75%</b>             | <b>Max</b>            |
|----------------------------|------------------------------------|--------------|-----------------------|-----------------------|------------------------|------------------------|------------------------|------------------------|-----------------------|
| <b>STATIC PERFORMANCE</b>  | Free stroke / m                    | 94           | 2.21x10 <sup>-3</sup> | 1.07x10 <sup>-2</sup> | 2.00x10 <sup>-7</sup>  | 1.75x10 <sup>-5</sup>  | 8.55x10 <sup>-5</sup>  | 3.17x10 <sup>-4</sup>  | 9.00x10 <sup>-2</sup> |
|                            | Deformation capacity               | 93           | 5.20                  | 44.5                  | 1.49x10 <sup>-3</sup>  | 7.14x10 <sup>-2</sup>  | 0.197                  | 0.495                  | 4.29x10 <sup>2</sup>  |
|                            | Force output / N                   | 28           | 1.05x10 <sup>-2</sup> | 2.94x10 <sup>-2</sup> | 1.25x10 <sup>-8</sup>  | 9.60x10 <sup>-5</sup>  | 3.78x10 <sup>-4</sup>  | 1.40x10 <sup>-3</sup>  | 0.132                 |
|                            | Force density / N m <sup>-3</sup>  | 26           | 3.42x10 <sup>9</sup>  | 1.62x10 <sup>10</sup> | 3.70x10 <sup>2</sup>   | 2.72x10 <sup>6</sup>   | 6.46x10 <sup>7</sup>   | 3.12x10 <sup>8</sup>   | 8.29x10 <sup>10</sup> |
|                            | Response time / s                  | 101          | 14.9                  | 47.0                  | 2.00x10 <sup>-4</sup>  | 3.50x10 <sup>-2</sup>  | 1.50                   | 6.00                   | 3.00x10 <sup>2</sup>  |
|                            | Recovery time / s                  | 38           | 54.4                  | 1.06x10 <sup>2</sup>  | 2.00x10 <sup>-3</sup>  | 1.00                   | 11.5                   | 49.0                   | 4.80x10 <sup>2</sup>  |
|                            | Velocity / m s <sup>-1</sup>       | 91           | 0.15                  | 0.58                  | 2.10x10 <sup>-8</sup>  | 2.21x10 <sup>-5</sup>  | 3.13x10 <sup>-4</sup>  | 4.10x10 <sup>-3</sup>  | 4.70                  |
| <b>DYNAMIC PERFORMANCE</b> | Work output / J                    | 44           | 1.06x10 <sup>-5</sup> | 6.78x10 <sup>-5</sup> | 3.75x10 <sup>-13</sup> | 1.51x10 <sup>-10</sup> | 3.67x10 <sup>-9</sup>  | 6.62x10 <sup>-8</sup>  | 4.50x10 <sup>-4</sup> |
|                            | Work capacity / J m <sup>-3</sup>  | 42           | 7.12x10 <sup>3</sup>  | 1.65x10 <sup>4</sup>  | 5.00x10 <sup>-5</sup>  | 21.7                   | 6.52x10 <sup>2</sup>   | 2.69x10 <sup>3</sup>   | 8.13x10 <sup>4</sup>  |
|                            | Power output / kW                  | 35           | 2.33x10 <sup>-6</sup> | 1.37x10 <sup>-5</sup> | 3.33x10 <sup>-16</sup> | 1.90x10 <sup>-12</sup> | 2.96x10 <sup>-11</sup> | 7.13x10 <sup>-10</sup> | 8.10x10 <sup>-5</sup> |
|                            | Power density / kW m <sup>-3</sup> | 35           | 8.74x10 <sup>2</sup>  | 2.90x10 <sup>3</sup>  | 5.14x10 <sup>-4</sup>  | 0.487                  | 2.77                   | 84.0                   | 1.53x10 <sup>4</sup>  |
|                            | Efficiency / $\eta$                | 23           | 1.50x10 <sup>-4</sup> | 5.49x10 <sup>-4</sup> | 3.53x10 <sup>-10</sup> | 1.97x10 <sup>-7</sup>  | 1.00x10 <sup>-6</sup>  | 3.37x10 <sup>-5</sup>  | 2.65x10 <sup>-3</sup> |

**Supporting Table S3 | Categorical features.** A list of all available categorical data of molecular crystals that explains their chemical nature, reactivity, and responsive behavior

| Categorical Features        | Explanation                                                                      | Categories                                                                                                                                                                                                                                                                                                                                                                                                                                                                                                                                                                                                                                                                                                                                   |
|-----------------------------|----------------------------------------------------------------------------------|----------------------------------------------------------------------------------------------------------------------------------------------------------------------------------------------------------------------------------------------------------------------------------------------------------------------------------------------------------------------------------------------------------------------------------------------------------------------------------------------------------------------------------------------------------------------------------------------------------------------------------------------------------------------------------------------------------------------------------------------|
| <b>Chemical family</b>      | <i>General chemical families each entry belong to</i>                            | <ul style="list-style-type: none"> <li>- Acids</li> <li>- Amphiphilic crystals</li> <li>- Anthracenes (AC)</li> <li>- Arylidene-furanones</li> <li>- Arylidene-imidazolones</li> <li>- Azobenzenes (AZ)</li> <li>- Benzoxazoles</li> <li>- Co-crystals</li> <li>- Diarylethenes (DE)</li> <li>- Halogenated benzenes</li> <li>- Hydrazides</li> <li>- Fluorenes</li> </ul> <ul style="list-style-type: none"> <li>- Furylfulgides</li> <li>- Methylbenzenes</li> <li>- Organometallic</li> <li>- Olefin pairs</li> <li>- Organic salts</li> <li>- Perylenes</li> <li>- Peptides</li> <li>- Perovskites</li> <li>- Pincer-type diesters</li> <li>- Naphthalene diimides</li> <li>- Sesquiterpene lactones</li> <li>- Salicylidenes</li> </ul> |
| <b>Reaction group</b>       | <i>The characteristic type of chemical reaction driving the response</i>         | <ul style="list-style-type: none"> <li>- Ring-opening isomerization</li> <li>- Photodimerization</li> <li>- Configurational Isomerization (trans-cis/ E-Z, keto-enol)</li> <li>- Molecular gliding</li> <li>- Molecular rotation</li> </ul> <ul style="list-style-type: none"> <li>- Conformational change</li> <li>- Molecular gliding/conformational</li> <li>- Molecular gliding/rotation</li> </ul>                                                                                                                                                                                                                                                                                                                                      |
| <b>Martensitic reaction</b> | <i>Diffusionless versus non-diffusionless phase transitions</i>                  | <ul style="list-style-type: none"> <li>- Yes</li> </ul> <ul style="list-style-type: none"> <li>- No</li> </ul>                                                                                                                                                                                                                                                                                                                                                                                                                                                                                                                                                                                                                               |
| <b>Phase transition</b>     | <i>Phase transition crystal transformations</i>                                  | <ul style="list-style-type: none"> <li>- Yes</li> </ul> <ul style="list-style-type: none"> <li>- No</li> </ul>                                                                                                                                                                                                                                                                                                                                                                                                                                                                                                                                                                                                                               |
| <b>Organo-metallic</b>      | <i>Presence of an organometallic complex</i>                                     | <ul style="list-style-type: none"> <li>- Yes</li> </ul> <ul style="list-style-type: none"> <li>- No</li> </ul>                                                                                                                                                                                                                                                                                                                                                                                                                                                                                                                                                                                                                               |
| <b>Type of Deformation</b>  | <i>Depends on SCSC vs surface transformations</i>                                | <ul style="list-style-type: none"> <li>- Bending</li> <li>- Twisting</li> <li>- Jumping</li> </ul> <ul style="list-style-type: none"> <li>- Axial expansion/contraction</li> </ul>                                                                                                                                                                                                                                                                                                                                                                                                                                                                                                                                                           |
| <b>Source of actuation</b>  | <i>Type of stimulus driving the response</i>                                     | <ul style="list-style-type: none"> <li>- Photo</li> </ul> <ul style="list-style-type: none"> <li>- Thermo</li> </ul>                                                                                                                                                                                                                                                                                                                                                                                                                                                                                                                                                                                                                         |
| <b>Crystal habit</b>        | <i>Geometric appearance of the crystal</i>                                       | <ul style="list-style-type: none"> <li>- Blade</li> <li>- Prism</li> <li>- Tabular</li> <li>- Parallelepiped</li> </ul> <ul style="list-style-type: none"> <li>- Plate</li> <li>- Needle</li> <li>- Block</li> <li>- Rod</li> </ul>                                                                                                                                                                                                                                                                                                                                                                                                                                                                                                          |
| <b>Crystal family</b>       | <i>Crystal systems based on unit cell</i>                                        | <ul style="list-style-type: none"> <li>- Triclinic</li> <li>- Orthorhombic</li> </ul> <ul style="list-style-type: none"> <li>- Hexagonal</li> <li>- Monoclinic</li> </ul>                                                                                                                                                                                                                                                                                                                                                                                                                                                                                                                                                                    |
| <b>Reversibility</b>        | <i>The crystal is able to retain its original state once stimulus is removed</i> | <ul style="list-style-type: none"> <li>- Yes</li> </ul> <ul style="list-style-type: none"> <li>- No</li> </ul>                                                                                                                                                                                                                                                                                                                                                                                                                                                                                                                                                                                                                               |
| <b>Crystal intact</b>       | <i>Structural integrity of crystal after actuation is preserved</i>              | <ul style="list-style-type: none"> <li>- Yes</li> </ul> <ul style="list-style-type: none"> <li>- No</li> </ul>                                                                                                                                                                                                                                                                                                                                                                                                                                                                                                                                                                                                                               |

**Supporting Table S4 | Continuous features.** A list of all available continuous features of molecular crystals including dimensions and physical properties, crystal lattice parameters, and molecular information. The spread of data and sample size for each feature are reported

|                                        | Continuous Features          | Count                | Mean                   | Std                   | Min                    | 25%                    | 50%                    | 75%                    | Max                   |
|----------------------------------------|------------------------------|----------------------|------------------------|-----------------------|------------------------|------------------------|------------------------|------------------------|-----------------------|
| PHYSICAL & MECHANICAL PROPERTIES       | Length / m                   | 106                  | 2.11x10 <sup>-3</sup>  | 6.50x10 <sup>-3</sup> | 6.00x10 <sup>-6</sup>  | 2.03x10 <sup>-4</sup>  | 5.15x10 <sup>-4</sup>  | 1.53x10 <sup>-3</sup>  | 6.00x10 <sup>-2</sup> |
|                                        | Width / m                    | 83                   | 2.62x10 <sup>-4</sup>  | 5.11x10 <sup>-4</sup> | 1.77x10 <sup>-7</sup>  | 3.60x10 <sup>-5</sup>  | 1.10x10 <sup>-4</sup>  | 2.41x10 <sup>-4</sup>  | 3.75x10 <sup>-3</sup> |
|                                        | Thickness / m                | 89                   | 1.07x10 <sup>-4</sup>  | 2.63x10 <sup>-4</sup> | 1.77x10 <sup>-7</sup>  | 6.00x10 <sup>-6</sup>  | 1.90x10 <sup>-5</sup>  | 5.15x10 <sup>-5</sup>  | 2.00x10 <sup>-3</sup> |
|                                        | Volume / m <sup>3</sup>      | 85                   | 6.94x10 <sup>-10</sup> | 3.70x10 <sup>-9</sup> | 2.35x10 <sup>-19</sup> | 2.38x10 <sup>-13</sup> | 2.64x10 <sup>-12</sup> | 3.10x10 <sup>-11</sup> | 3.00x10 <sup>-8</sup> |
|                                        | Weight / kg                  | 34                   | 1.92x10 <sup>-7</sup>  | 4.71x10 <sup>-7</sup> | 1.28x10 <sup>-11</sup> | 2.83x10 <sup>-9</sup>  | 1.29x10 <sup>-8</sup>  | 9.00x10 <sup>-8</sup>  | 2.27x10 <sup>-6</sup> |
|                                        | E / GPa                      | 17                   | 5.87                   | 4.16                  | 0.760                  | 2.60                   | 3.80                   | 8.50                   | 1.50x10 <sup>1</sup>  |
|                                        | Melting point / °C           | 40                   | 1.51x10 <sup>2</sup>   | 43.7                  | 78.0                   | 1.24x10 <sup>2</sup>   | 1.57x10 <sup>2</sup>   | 1.71x10 <sup>2</sup>   | 2.51x10 <sup>2</sup>  |
|                                        | Density / kg m <sup>-3</sup> | 113                  | 1.45                   | 0.26                  | 0.91                   | 1.32                   | 1.42                   | 1.52                   | 3.02                  |
| CRYSTAL LATTICE PARAMETERS             | Z Value                      | 116                  | 4.00                   | 2.53                  | 1.00                   | 2.00                   | 4.00                   | 4.00                   | 18.0                  |
|                                        | <i>a</i>                     | 117                  | 11.7                   | 9.26                  | 3.77                   | 7.12                   | 9.77                   | 12.4                   | 59.4                  |
|                                        | <i>b</i>                     | 117                  | 12.2                   | 6.43                  | 3.77                   | 7.27                   | 11.2                   | 13.8                   | 33.8                  |
|                                        | <i>c</i>                     | 117                  | 19.2                   | 9.46                  | 4.02                   | 12.6                   | 17.4                   | 23.1                   | 60.1                  |
|                                        | <i>Alpha</i>                 | 116                  | 89.2                   | 6.53                  | 70.7                   | 89.4                   | 90.0                   | 90.0                   | 1.09x10 <sup>2</sup>  |
|                                        | <i>Beta</i>                  | 116                  | 93.5                   | 9.45                  | 73.6                   | 89.6                   | 93.1                   | 99.5                   | 1.24x10 <sup>2</sup>  |
|                                        | <i>Gamma</i>                 | 116                  | 90.3                   | 6.22                  | 62.4                   | 90.0                   | 90.0                   | 90.0                   | 1.20x10 <sup>2</sup>  |
|                                        | Cell volume                  | 117                  | 2.19x10 <sup>3</sup>   | 1.50x10 <sup>3</sup>  | 1.69x10 <sup>2</sup>   | 1.17x10 <sup>3</sup>   | 2.06x10 <sup>3</sup>   | 2.46x10 <sup>3</sup>   | 1.09x10 <sup>4</sup>  |
|                                        | Unique chemical units        | 106                  | 1.49                   | 0.819                 | 1.00                   | 1.00                   | 1.00                   | 2.00                   | 4.00                  |
|                                        | Molecular volume             | 104                  | 6.17x10 <sup>2</sup>   | 3.34x10 <sup>2</sup>  | 1.47x10 <sup>2</sup>   | 3.58x10 <sup>2</sup>   | 5.74x10 <sup>2</sup>   | 7.85x10 <sup>2</sup>   | 1.70x10 <sup>3</sup>  |
| Molecular weight / g mol <sup>-1</sup> | 117                          | 5.19x10 <sup>2</sup> | 2.66x10 <sup>2</sup>   | 1.29x10 <sup>2</sup>  | 2.90x10 <sup>2</sup>   | 4.95x10 <sup>2</sup>   | 6.83x10 <sup>2</sup>   | 1.22x10 <sup>3</sup>   |                       |



**Supporting Table S5 | Two-sample t-test results.** All the t-tests of significant difference between any pair of categories with respect to continuous performance features are shown. The minimum significant sample size for each category was set at 10 and the confidence interval at 95%

| Categorical Feature           | Category 1 Name    | Category 2 Name    | Cat. 1 Size | Cat. 2 Size   | Performance Index     | p-value                |
|-------------------------------|--------------------|--------------------|-------------|---------------|-----------------------|------------------------|
| <b>Chemical family</b>        | Acids              | Organometallic     | 10          | 19            | Free stroke           | $3.77 \times 10^{-3}$  |
|                               | DE                 | Organometallic     | 26          | 19            | Free stroke           | $6.86 \times 10^{-5}$  |
|                               | Acid               | Organometallic     | 10          | 18            | Deformation capacity  | $1.18 \times 10^{-2}$  |
|                               | DE                 | Organometallic     | 26          | 18            | Deformation capacity  | $1.37 \times 10^{-3}$  |
|                               | Acid               | Organometallic     | 10          | 24            | Response time         | $1.71 \times 10^{-2}$  |
|                               | DE                 | Organometallic     | 20          | 24            | Response time         | $3.45 \times 10^{-3}$  |
| <b>Reaction group</b>         | Molecular gliding  | Photodimerization  | 10          | 11            | Free stroke           | $3.18 \times 10^{-2}$  |
|                               | Molecular rotation | Photodimerization  | 14          | 11            | Free stroke           | $3.53 \times 10^{-4}$  |
|                               | Molecular rotation | Ring-opening       | 14          | 27            | Free stroke           | $1.00 \times 10^{-5}$  |
|                               | Photodimerization  | Ring-opening       | 11          | 27            | Free stroke           | $3.32 \times 10^{-2}$  |
|                               | Isomerization      | Ring-opening       | 17          | 27            | Deformation capacity  | $3.64 \times 10^{-2}$  |
|                               | Molecular gliding  | Molecular rotation | 10          | 14            | Deformation capacity  | $2.49 \times 10^{-2}$  |
|                               | Molecular rotation | Photodimerization  | 14          | 11            | Deformation capacity  | $2.11 \times 10^{-3}$  |
|                               | Molecular rotation | Ring-opening       | 14          | 27            | Deformation capacity  | $1.09 \times 10^{-3}$  |
|                               | Isomerization      | Photodimerization  | 15          | 21            | Velocity              | $1.54 \times 10^{-3}$  |
|                               | Isomerization      | Ring-opening       | 15          | 20            | Velocity              | $3.91 \times 10^{-2}$  |
|                               | Molecular gliding  | Photodimerization  | 11          | 21            | Velocity              | $2.19 \times 10^{-3}$  |
|                               | Molecular gliding  | Ring-opening       | 11          | 20            | Velocity              | $2.32 \times 10^{-2}$  |
|                               | Molecular rotation | Photodimerization  | 10          | 21            | Velocity              | $4.93 \times 10^{-2}$  |
|                               | Isomerization      | Molecular rotation | 17          | 12            | Response time         | $2.83 \times 10^{-3}$  |
|                               | Molecular gliding  | Molecular rotation | 13          | 12            | Response time         | $1.82 \times 10^{-2}$  |
| Molecular rotation            | Ring-opening       | 12                 | 21          | Response time | $2.69 \times 10^{-3}$ |                        |
| <b>Martensitic transition</b> | No                 | Yes                | 64          | 15            | Deformation capacity  | $2.19 \times 10^{-2}$  |
|                               | No                 | Yes                | 28          | 12            | Work capacity         | $2.76 \times 10^{-4}$  |
|                               | No                 | Yes                | 20          | 11            | Power output          | $3.06 \times 10^{-4}$  |
|                               | No                 | Yes                | 68          | 21            | Response time         | $2.77 \times 10^{-3}$  |
| <b>Phase transition</b>       | No                 | Yes                | 53          | 41            | Free stroke           | $4.75 \times 10^{-3}$  |
|                               | No                 | Yes                | 53          | 40            | Deformation capacity  | $2.09 \times 10^{-5}$  |
|                               | No                 | Yes                | 44          | 47            | Velocity              | $1.04 \times 10^{-3}$  |
|                               | No                 | Yes                | 12          | 16            | Force output          | $3.48 \times 10^{-2}$  |
|                               | No                 | Yes                | 12          | 23            | Power output          | $1.64 \times 10^{-3}$  |
|                               | No                 | Yes                | 49          | 52            | Response time         | $6.18 \times 10^{-10}$ |
|                               | No                 | Yes                | 20          | 18            | Recovery time         | $1.19 \times 10^{-3}$  |
| No                            | Yes                | 10                 | 13          | Efficiency    | $2.56 \times 10^{-3}$ |                        |

|                            |         |                       |    |    |                      |                        |
|----------------------------|---------|-----------------------|----|----|----------------------|------------------------|
| <b>Source of actuation</b> | Photo   | Thermo                | 61 | 29 | Deformation capacity | $5.77 \times 10^{-4}$  |
|                            | Photo   | Thermo                | 16 | 11 | Force output         | $1.00 \times 10^{-2}$  |
|                            | Photo   | Thermo                | 29 | 14 | Work capacity        | $5.29 \times 10^{-5}$  |
|                            | Photo   | Thermo                | 21 | 13 | Power output         | $2.09 \times 10^{-5}$  |
|                            | Photo   | Thermo                | 64 | 34 | Response time        | $1.11 \times 10^{-3}$  |
|                            | Photo   | Thermo                | 25 | 11 | Recovery time        | $3.28 \times 10^{-3}$  |
| <b>Type of deformation</b> | Bending | Jumping               | 52 | 12 | Free stroke          | $1.47 \times 10^{-3}$  |
|                            | Bending | Expansion/contraction | 52 | 27 | Free stroke          | $2.86 \times 10^{-9}$  |
|                            | Bending | Jumping               | 51 | 12 | Deformation capacity | $7.40 \times 10^{-5}$  |
|                            | Bending | Expansion/contraction | 51 | 27 | Deformation capacity | $1.60 \times 10^{-5}$  |
|                            | Bending | Jumping               | 45 | 24 | Velocity             | $1.92 \times 10^{-13}$ |
|                            | Bending | Expansion/contraction | 45 | 19 | Velocity             | $3.27 \times 10^{-2}$  |
|                            | Jumping | Expansion/contraction | 24 | 19 | Velocity             | $2.17 \times 10^{-10}$ |
|                            | Bending | Expansion/contraction | 11 | 11 | Force output         | $2.61 \times 10^{-2}$  |
|                            | Bending | Jumping               | 47 | 30 | Response time        | $1.06 \times 10^{-10}$ |
|                            | Jumping | Expansion/contraction | 30 | 20 | Response time        | $1.55 \times 10^{-3}$  |
|                            | Bending | Expansion/contraction | 23 | 11 | Recovery time        | $1.71 \times 10^{-2}$  |

**Supporting Table S6 | Ensemble learning feature importance scores.** A list of features with associated feature importance scores ( $F_{\text{score}}$ ) normalized for each actuation performance index demonstrating each feature's contribution to the learning model

| Free Stroke        |                     | Force Output       |                     | Response Time      |                     | Velocity           |                     |
|--------------------|---------------------|--------------------|---------------------|--------------------|---------------------|--------------------|---------------------|
| $F_{\text{score}}$ | Feature             | $F_{\text{score}}$ | Feature             | $F_{\text{score}}$ | Feature             | $F_{\text{score}}$ | Feature             |
| 0.2169             | Type of deformation | 0.1883             | Width               | 0.1346             | Type of deformation | 0.3582             | Type of deformation |
| 0.2085             | Length              | 0.1014             | Thickness           | 0.0969             | Martensitic         | 0.0617             | Density             |
| 0.1224             | Molecular volume    | 0.0983             | Molecular volume    | 0.0706             | Cell volume         | 0.0448             | Source of actuation |
| 0.0585             | Unique chem. units  | 0.0870             | Weight              | 0.0646             | <i>b</i>            | 0.0441             | Weight              |
| 0.0491             | Source of actuation | 0.0790             | Length              | 0.0636             | Crystal family      | 0.0417             | Chemical family     |
| 0.0367             | Thickness           | 0.0616             | Source of actuation | 0.0620             | Organometallic      | 0.0415             | Length              |
| 0.0297             | Organometallic      | 0.0461             | <i>a</i>            | 0.0583             | <i>a</i>            | 0.0371             | Cell volume         |
| 0.0259             | Crystal habit       | 0.0435             | Molecular weight    | 0.0570             | Phase transition    | 0.0296             | Crystal family      |
| 0.0252             | Molecular weight    | 0.0433             | Type of deformation | 0.0447             | Reaction group      | 0.0280             | <i>a</i>            |
| 0.0224             | Density             | 0.0416             | Organometallic      | 0.0410             | Source of actuation | 0.0275             | Reaction group      |
| 0.0219             | <i>c</i>            | 0.0329             | Martensitic         | 0.0337             | Crystal habit       | 0.0273             | Reversibility       |
| 0.0188             | Martensitic         | 0.0223             | <i>b</i>            | 0.0288             | Reversibility       | 0.0258             | <i>b</i>            |
| 0.0175             | Chemical family     | 0.0214             | Cell volume         | 0.0272             | Thickness           | 0.0249             | Organometallic      |

| Work Capacity      |                     | Power Output       |                     | Efficiency         |                     |
|--------------------|---------------------|--------------------|---------------------|--------------------|---------------------|
| $F_{\text{score}}$ | Feature             | $F_{\text{score}}$ | Feature             | $F_{\text{score}}$ | Feature             |
| 0.2164             | Crystal habit       | 0.0983             | Phase transition    | 0.2064             | Martensitic         |
| 0.0849             | Source of actuation | 0.0942             | Source of actuation | 0.0849             | Type of deformation |
| 0.0814             | Martensitic         | 0.0684             | Reaction group      | 0.0667             | <i>Beta</i>         |
| 0.0555             | Crystal family      | 0.0647             | Chemical family     | 0.0613             | Phase transition    |
| 0.0518             | Type of deformation | 0.0560             | Cell volume         | 0.0493             | Chemical family     |
| 0.0471             | Width               | 0.0528             | Crystal habit       | 0.0426             | <i>b</i>            |
| 0.0434             | <i>c</i>            | 0.0517             | Molecular volume    | 0.0383             | Molecular weight    |
| 0.0418             | Length              | 0.0391             | <i>a</i>            | 0.0362             | Crystal family      |
| 0.0394             | <i>a</i>            | 0.0379             | Melting point       | 0.0342             | Density             |
| 0.0393             | Reversibility       | 0.0368             | Thickness           | 0.0325             | <i>c</i>            |
| 0.0384             | <i>Beta</i>         | 0.0351             | Organometallic      | 0.0320             | Width               |
| 0.0382             | Organometallic      | 0.0340             | <i>c</i>            | 0.0312             | Molecular volume    |
| 0.0293             | Reaction group      | 0.0313             | Width               | 0.0288             | Reaction group      |

**Supporting Table S7 | Classes of actuators.** All actuator classes and the sub-families within each class considered in the comparison with molecular crystals

| Actuator Class                 | Types of Actuators                                                                                                                              |                                                                                                                                                                         |
|--------------------------------|-------------------------------------------------------------------------------------------------------------------------------------------------|-------------------------------------------------------------------------------------------------------------------------------------------------------------------------|
| <i>Electromagnetic Devices</i> | <ul style="list-style-type: none"> <li>- Electric Cylinders</li> <li>- Voice Coil Motors</li> <li>- Solenoids</li> <li>- Mini-Linear</li> </ul> |                                                                                                                                                                         |
| <i>Magnetostriction</i>        | Ferromagnetic Actuators                                                                                                                         |                                                                                                                                                                         |
| <i>MEMS</i>                    | Micro-Electromechanical Systems                                                                                                                 |                                                                                                                                                                         |
| <i>Fluidic</i>                 | <ul style="list-style-type: none"> <li>- Hydraulic</li> <li>- Pneumatic</li> </ul>                                                              |                                                                                                                                                                         |
| <i>Piezoelectric</i>           | <ul style="list-style-type: none"> <li>- Ceramic Piezoelectric</li> <li>- Electrostrictive Actuators</li> </ul>                                 |                                                                                                                                                                         |
| <i>Shape Memory Alloys</i>     | Shape Memory-NiTi                                                                                                                               |                                                                                                                                                                         |
| <i>Thermally Actuated</i>      | Bimetallic Strips                                                                                                                               |                                                                                                                                                                         |
| <i>Smart Materials</i>         | Nano-muscles                                                                                                                                    |                                                                                                                                                                         |
| <i>Hydrogels</i>               | (single class)                                                                                                                                  |                                                                                                                                                                         |
| <i>Responsive Polymers</i>     | Electroactive Polymers (EAP) – Ionic                                                                                                            | <ul style="list-style-type: none"> <li>- Ionic Polymer–Metal Composites (IPMC)</li> <li>- Conductive Polymers (CP)</li> <li>- Polymer Carbon Nanotubes (CNT)</li> </ul> |
|                                | Electroactive Polymers (EAP) – Electronic                                                                                                       | <ul style="list-style-type: none"> <li>- Dielectric Elastomers (DEA)</li> <li>- Liquid Crystal Elastomers (LCE)</li> </ul>                                              |
|                                | Shape Memory Polymers (SMP)                                                                                                                     |                                                                                                                                                                         |
| <i>Natural</i>                 | Muscle                                                                                                                                          |                                                                                                                                                                         |
| <i>Molecular Crystals</i>      | <ul style="list-style-type: none"> <li>- Photo/Thermoresponsive</li> <li>- Organic Single-crystal Solids</li> </ul>                             |                                                                                                                                                                         |

### III. SUPPORTING FIGURES

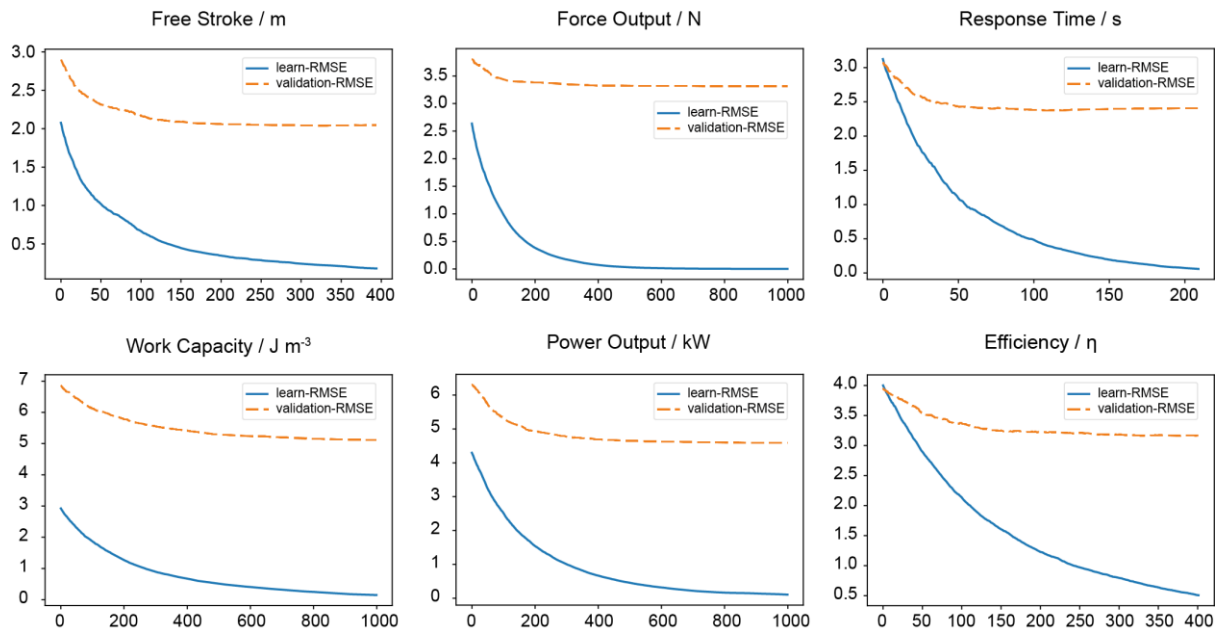

**Supporting Figure S1 | Learning ensemble training and validation losses.** Root mean squared error (RMSE) log-scale learning and validation loss functions to evaluate the performance of the machine learning model.
